# Supplementary material
Source: PubMed Central journal article supplement (PMC4933641)
Supplement: supp_4.2.E141_2015-0006-1-at.pdf [file supp_4.2.E141_2015-0006-1-at.pdf]

## **Appendix 1 (as supplied by the authors): Ontario Paediatric Diabetes Network Programs**

### **Tertiary Centres**

London, Children's Hospital Paediatric Diabetes, London Health Sciences Centre

Ottawa, Children's Hospital of Eastern Ontario (CHEO)

Hamilton, McMaster Children's Hospital

Toronto, The Hospital for Sick Children

Kingston, Hotel Dieu Pediatric Diabetes Education Program

### **Large Community Centres (≥100 patients with type 1 diabetes in 2012)**

Thunder Bay, Diabetes Health Thunder Bay / St. Joseph's Care Group

Barrie, Child and Youth Diabetes Centre, Royal Victoria Regional Health Centre

Sudbury, Diabetes Care Service, Health Sciences North

Peterborough, Paediatric Diabetes Education Centre, Peterborough Regional Health Centre

St. Catharines, Diabetes Education Centre, Niagara Health System

Scarborough, Paediatric Diabetes Education Clinic, Rouge Valley Health System

Brampton, Diabetes Education Centre, William Osler Health System, Brampton Civic Hospital

Mississauga, Credit Valley Hospital – Diabetes Care Centre

Windsor, Paediatric Diabetes/Metabolic Program, Windsor Regional Hospital

Orillia, Orillia Soldier's Memorial Hospital Paediatric Diabetes Education Program

Kitchener, Juvenile Diabetes Education Clinic, Grand River Hospital

Mississauga, Trillium Paediatric Diabetes Centre

Whitby, Charles H. Best Diabetes Centre

Markham, Markham Stouffville Hospital Paediatric Diabetes Program

### **Small Community Centres (<100 patients with type 1 diabetes in 2012)**

Moose Factory, Weeneebayko Diabetes Health Education Program

Sioux Lookout, Sioux Lookout Meno Ya Win Health Centre Diabetes Program

Pembroke, Diabetes Education Clinic and Nutrition Counseling, Pembroke Regional Hospital

North Bay, Diabetes Centre – North Bay Regional Health Centre

Timmins, VON Diabetes Education Centre

Guelph, Guelph General Hospital Paediatric Diabetes Program

Belleville, Diabetes Education and Management Program, Quinte Health Care

Orangeville, Diabetes Care Program, Headwaters Health Care Centre

Chatham, Diabetes Education Centre, Chatham-Kent Health Alliance

Cambridge, Diabetes Education Program, Cambridge Memorial Hospital

Sault Ste. Marie, Algoma Diabetes Education and Care Program, Group Health Centre

Brantford, Diabetes Education Centre, Brant Community Healthcare System

Sarnia, Diabetes and Clinical Nutrition, Bluewater Health

Owen Sound, Diabetes Grey Bruce, Grey Bruce Health Services

Burlington, Joseph Brant Paediatric Diabetes Program, Joseph Brant Hospital

North York, North York General Hospital Diabetes Education Centre
